# Supplementary material for: Fibrin-targeting molecular MRI in inflammatory CNS disorders
Source: PubMed Central journal article supplement (PMC9399196; doi:10.1007/s00259-022-05807-8), 2022-05-04
Supplement: 259_2022_5807_MOESM2_ESM.pdf [file 259_2022_5807_MOESM2_ESM.pdf]

# Appendix E2

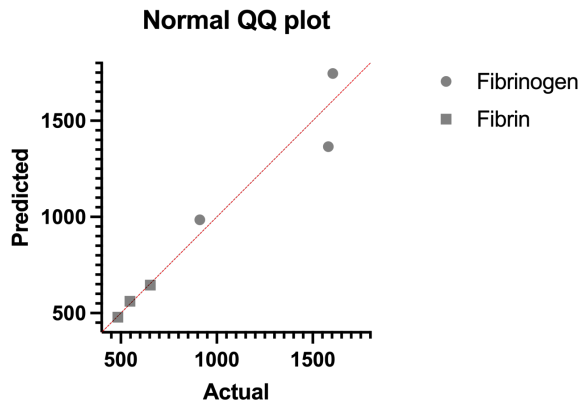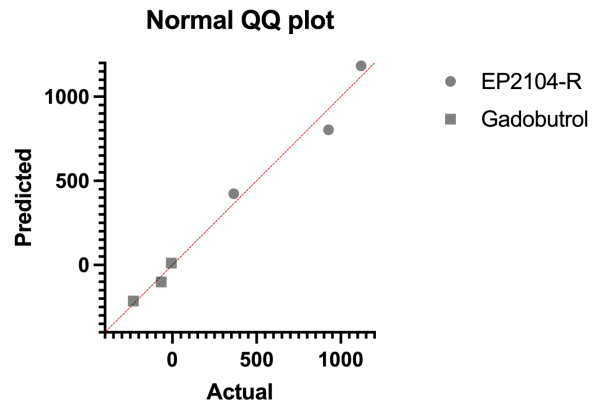

E2.1. Q-Q plot

E2.2. Q-Q plot

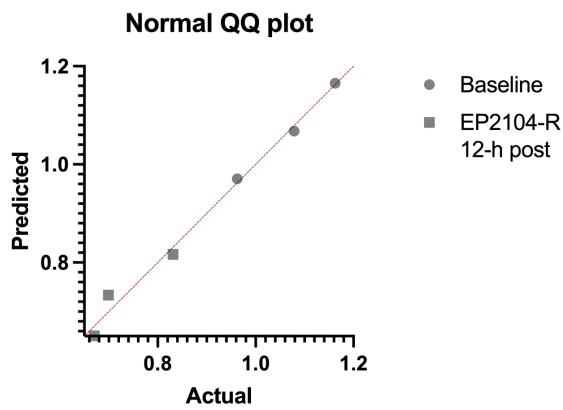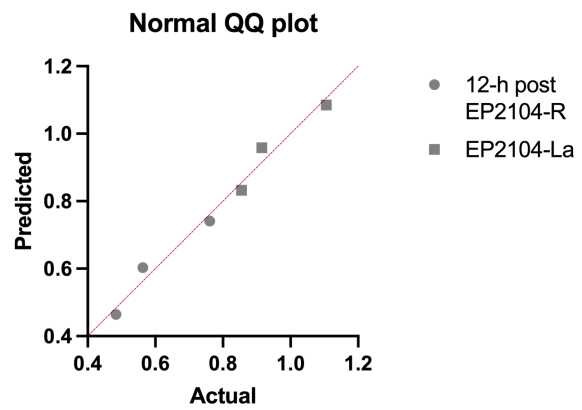

E2.3. Q-Q plot

E2.4. Q-Q plot

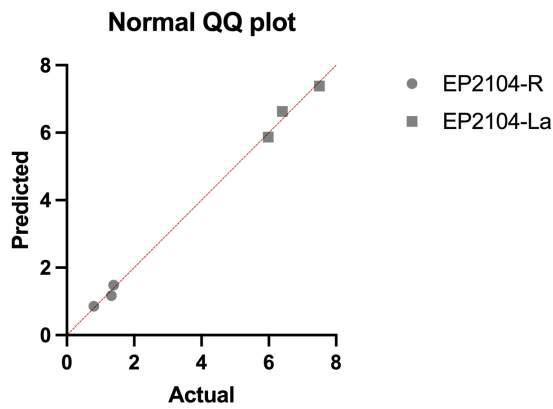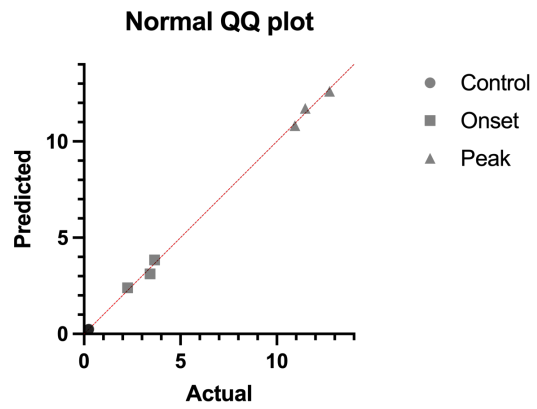

E2.5. Q-Q plot

E2.6. Q-Q plot

## Appendix E2

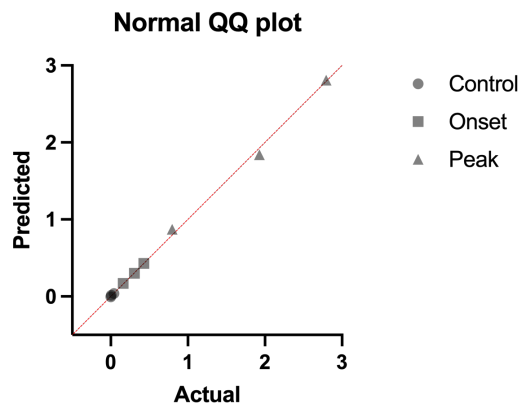

E2.7. Q-Q plot

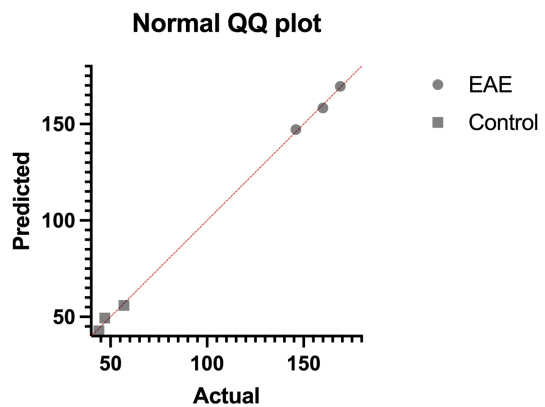

E2.8. Q-Q plot

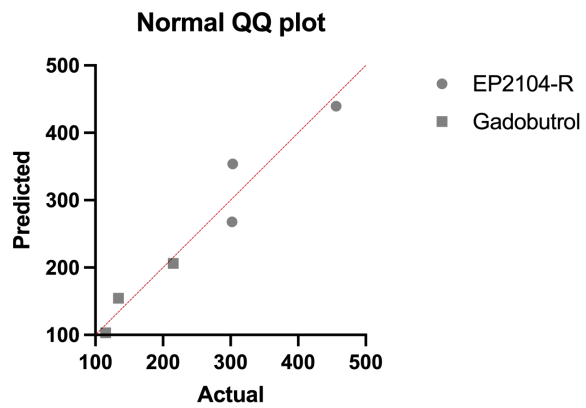

E2.9. Q-Q plot

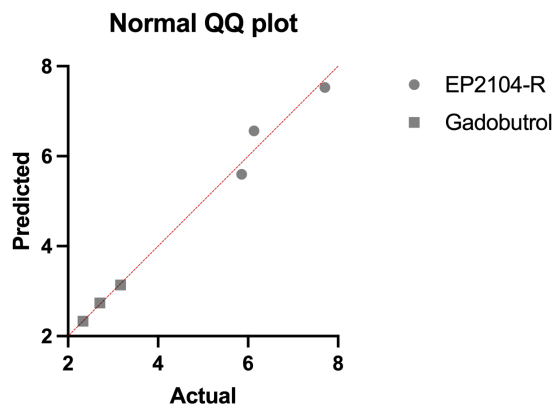

E2.10. Q-Q plot

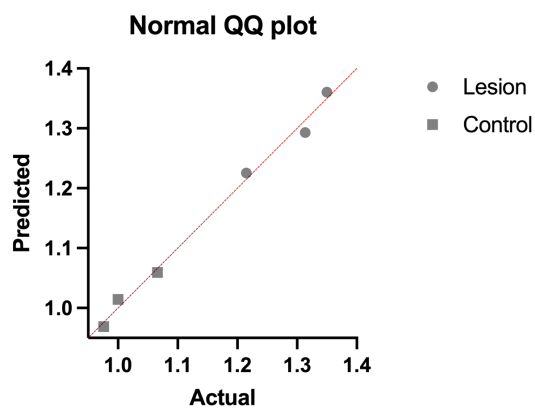

E2.11. Q-Q plot
